# Supplementary material for: Additions, Losses, and Rearrangements on the Evolutionary Route from a Reconstructed Ancestor to the Modern Saccharomyces cerevisiae Genome
Source: PLoS Genet. 2009 May 15;5(5):e1000485. doi: 10.1371/journal.pgen.1000485 (PMC2675101; doi:10.1371/journal.pgen.1000485)
Supplement: Table S2 — Genomic rearrangements shared among post-WGD species. (0.02 MB XLS) [file pgen.1000485.s003.xls]

## Sheet: Sheet1
Table S2. Genomic rearrangements shared among post-WGD species.
Rearrangements shared by S. cerevisiae, C. glabrata and N. castellii:
Old junctions broken:	New junctions formed:	Rearrangement Type:
Anc_1.390-Anc_1.391 and Anc_2.310-Anc_2.311	YGL158W-YGL156W and YNL014W-YNL015W	Reciprocal Translocation
Anc_1.119-Anc_1.124 and Telomere-Anc_2.1	YNL243W-YNL242W and Telomere-YJL210W	Telomeric Translocation
Anc_2.294-Anc_2.296 and Anc_2.304-Anc_2.306	YNL032W-YNL016W* and YNL025C-YNL026W	Inversion
Anc_2.492-Anc_2.493 and Anc_2.539-Anc_2.540	YHL008C-YHL009C and YMR076C-YMR078C	Inversion
Anc_3.284-Anc_3.287 and Anc_3.294-Anc_3.299	YDR046C-YDR047W and YDR051C-YDR052C	Inversion
Anc_5.178-Anc_5.179 and Anc_5.186-Anc_5.188	YGR173W-YGR174C and YGR180C-YGR181W	Inversion
Anc_5.222-Anc_5.226 and Anc_5.228-Anc_5.230	YLR002C-YLR003C and YLR005W-YLR006C	Inversion
Anc_7.236-Anc_7.237 and Anc_7.240-Anc_7.243	YIL049W-YIL050W and YIL052C-YIL053W	Inversion
Rearrangements shared by S. cerevisiae and C. glabrata:
Old junctions broken:	New junctions formed:	Rearrangement Type:
Anc_1.155-Anc_1.157 and Anc_1.439-Anc_1.443	YCR028C-YCR023C and YJR030C-YJR031C	Reciprocal Translocation
Anc_1.188-Anc_1.194 and Anc_5.646-Anc_5.648	YKL163W-YKL162C and YKR066C-YKR067W	Reciprocal Translocation
Anc_2.204-Anc_2.206 and Anc_5.693-Anc_5.695	YOR085W-YOR084W and YIL142W-YIL143C	Reciprocal Translocation
Anc_3.327-Anc_3.328 and Anc_7.475-Anc_7.476	YBL038W-YBL039C and YPR047W-YPR046W	Reciprocal Translocation
Anc_4.354-Anc_4.356 and Anc_8.857-Anc_8.859	YML082W-YML085C and YHR191C-YHR190W	Reciprocal Translocation
Anc_5.509-Anc_5.511 and Anc_6.46-Anc_6.48	YOR156C-YOR171C and YML041C-YML043C	Reciprocal Translocation
Anc_1.312-Anc_1.315 and Anc_1.337-Anc_1.338	YBR264C-YBR265W and YBR275C-YBR276C	Inversion
Anc_1.384-Anc_1.386 and Anc_1.388-Anc_1.389	YLR173W-YLR174W and YLR250W-YLR251W	Inversion
Anc_1.434-Anc_1.437 and Anc_1.440-Anc_1.443	YCR017C-YCR019W and YCR020W-B-YCR027C*	Inversion
Anc_3.102-Anc_3.105 and Anc_3.114-Anc_3.117	YBR146W-YBR147W and YBR154C-YBR155W	Inversion
Anc_3.132-Anc_3.134 and Anc_3.401-Anc_3.403	YGR078C-YGR079W and YBR136W-YBR137W	Inversion
Anc_5.157-Anc_5.160 and Anc_5.175-Anc_5.179	YJL011C-YJL026W* and YJR006W-YJR007W	Inversion
Anc_5.228-Anc_5.231 and Anc_5.245-Anc_5.249	YJL036W-YJL045W* and YJL029C-YJR005W*	Inversion
Anc_5.501-Anc_5.502 and Anc_5.509-Anc_5.511	YOR155C-YOR156C and YOR161C-YML041C*	Inversion
Telomere-Anc_6.1 and Anc_6.17-Anc_6.20	Telomere-YEL062W and YEL055C-YML003W*	Inversion
Anc_6.13-Anc_6.14 and Anc_6.21-Anc_6.22	YOR002W-YOR003W and YOR007C-YPL262W*	Inversion
Anc_6.46-Anc_6.48 and Anc_6.59-Anc_6.60	YOR171C-YOR172W and YOR163W-YML043C*	Inversion
Anc_7.101-Anc_7.105 and Anc_7.121-Anc_7.124	YOR008C-YOR012W and YOL034W-YOL036W	Inversion
Anc_8.74-Anc_8.75 and Anc_8.80-Anc_8.81	YPL009C-YPL008W and YPL014W-YPL015C	Inversion
* Shares breakpoint with another event
